# Supplementary material
Source: PubMed Central journal article supplement (PMC3008362)
Supplement: tableS1.pdf [file tableS1.pdf]

1  
2  
3  
4  
5  
6

**Supplementary Table 1.** *Up-regulated genes mapped to the IPA database*

| Gene                            | Description                                                | Fold  | P-value  |
|---------------------------------|------------------------------------------------------------|-------|----------|
| AADAT                           | aminoadipate aminotransferase                              | 1.335 | 1.25E-04 |
| ABHD4                           | abhydrolase domain containing 4                            | 1.491 | 2.03E-03 |
| ACADSB                          | acyl-Coenzyme A dehydrogenase, short/branched chain        | 1.871 | 1.19E-02 |
| ACADVL                          | acyl-Coenzyme A dehydrogenase, very long chain             | 1.422 | 1.93E-12 |
| ACP2                            | acid phosphatase 2, lysosomal                              | 1.380 | 8.19E-03 |
| ADAMTS4                         | ADAM metalloproteinase with thrombospondin type 1 motif, 4 | 1.886 | 1.76E-02 |
| ADFP                            | adipose differentiation-related protein                    | 2.435 | 5.65E-04 |
| ADIPOR2                         | adiponectin receptor 2                                     | 1.361 | 2.43E-02 |
| ALG13<br>(includes<br>EG:79868) | asparagine-linked glycosylation 13 homolog (S. cerevisiae) | 1.402 | 4.09E-02 |
| ANGPTL4                         | angiopoietin-like 4                                        | 5.483 | 0.00E00  |
| APOA1                           | apolipoprotein A-I                                         | 1.216 | 1.24E-02 |
| AQP3                            | aquaporin 3 (Gill blood group)                             | 1.435 | 1.14E-02 |
| ARFGAP3                         | ADP-ribosylation factor GTPase activating protein 3        | 1.108 | 1.92E-02 |
| ARG1                            | arginase, liver                                            | 1.320 | 4.27E-05 |
| ARG2                            | arginase, type II                                          | 4.119 | 2.07E-04 |
| ARHGEF10L                       | Rho guanine nucleotide exchange factor (GEF) 10-like       | 1.807 | 8.42E-06 |
| ARL6IP5                         | ADP-ribosylation-like factor 6 interacting protein 5       | 1.130 | 2.87E-03 |
| ASPH                            | aspartate beta-hydroxylase                                 | 1.351 | 4.67E-02 |
| BCKDK                           | branched chain ketoacid dehydrogenase kinase               | 1.197 | 1.18E-02 |
| BNIP3L                          | BCL2/adenovirus E1B 19kDa interacting protein 3-like       | 1.195 | 3.69E-02 |
| BTG3                            | BTG family, member 3                                       | 1.231 | 3.56E-02 |
| C16ORF80                        | chromosome 16 open reading frame 80                        | 1.303 | 1.44E-03 |
| C1ORF21                         | chromosome 1 open reading frame 21                         | 1.241 | 2.22E-02 |
| C6ORF165                        | chromosome 6 open reading frame 165                        | 3.622 | 4.38E-04 |
| C8ORF4                          | chromosome 8 open reading frame 4                          | 1.226 | 1.20E-02 |
| CADM1                           | cell adhesion molecule 1                                   | 1.141 | 2.52E-02 |
| CCL2                            | chemokine (C-C motif) ligand 2                             | 2.519 | 5.88E-06 |
| CD36                            | CD36 molecule (thrombospondin receptor)                    | 1.802 | 6.14E-08 |
| CD69                            | CD69 molecule                                              | 1.703 | 1.95E-02 |
| CGREF1                          | cell growth regulator with EF-hand domain 1                | 3.430 | 9.31E-04 |
| CIAPIN1                         | cytokine induced apoptosis inhibitor 1                     | 1.332 | 3.77E-04 |
| CIDEB                           | cell death-inducing DFFA-like effector b                   | 1.206 | 6.43E-03 |
| CLDN15                          | claudin 15                                                 | 1.532 | 6.01E-05 |
| CMPK1                           | cytidine monophosphate (UMP-CMP) kinase 1, cytosolic       | 1.153 | 1.84E-02 |
| CNN1                            | calponin 1, basic, smooth muscle                           | 1.294 | 4.68E-02 |
| COQ3                            | coenzyme Q3 homolog, methyltransferase (S. cerevisiae)     | 1.205 | 2.85E-05 |

|          |                                                                                                                                       |       |          |
|----------|---------------------------------------------------------------------------------------------------------------------------------------|-------|----------|
| CPT1B    | carnitine palmitoyltransferase 1B (muscle)                                                                                            | 5.515 | 2.17E-09 |
| CPT2     | carnitine palmitoyltransferase II                                                                                                     | 1.231 | 3.15E-03 |
| CREB3L3  | cAMP responsive element binding protein 3-like 3                                                                                      | 3.238 | 1.15E-12 |
| CRYBB1   | crystallin, beta B1                                                                                                                   | 2.578 | 3.11E-03 |
| CTGF     | connective tissue growth factor                                                                                                       | 1.655 | 1.42E-02 |
| CXCR4    | chemokine (C-X-C motif) receptor 4                                                                                                    | 1.832 | 1.73E-02 |
| CYP11A1  | cytochrome P450, family 11, subfamily A, polypeptide 1                                                                                | 4.354 | 2.55E-10 |
| CYP4F3   | cytochrome P450, family 4, subfamily F, polypeptide 3                                                                                 | 1.478 | 3.87E-03 |
| CYR61    | cysteine-rich, angiogenic inducer, 61                                                                                                 | 1.311 | 3.37E-02 |
| DDC      | dopa decarboxylase (aromatic L-amino acid decarboxylase)                                                                              | 1.205 | 2.13E-02 |
| DDO      | D-aspartate oxidase                                                                                                                   | 6.119 | 1.06E-02 |
| DDX10    | DEAD (Asp-Glu-Ala-Asp) box polypeptide 10                                                                                             | 1.591 | 4.48E-02 |
| DPP4     | dipeptidyl-peptidase 4                                                                                                                | 1.198 | 4.36E-02 |
| DPYD     | dihydropyrimidine dehydrogenase                                                                                                       | 1.117 | 3.98E-02 |
| DYNC1H1  | dynein, cytoplasmic 1, intermediate chain 1                                                                                           | 3.201 | 3.13E-03 |
| DZIP3    | DAZ interacting protein 3, zinc finger                                                                                                | 1.433 | 1.05E-02 |
| ECD      | ecdysoneless homolog (Drosophila)                                                                                                     | 1.327 | 9.37E-03 |
| ERGIC1   | endoplasmic reticulum-golgi intermediate compartment (ERGIC) 1                                                                        | 1.367 | 4.08E-05 |
| FAM82A2  | family with sequence similarity 82, member A2                                                                                         | 1.599 | 1.03E-04 |
| FCGRT    | Fc fragment of IgG, receptor, transporter, alpha                                                                                      | 1.134 | 2.37E-02 |
| FOS      | v-fos FBJ murine osteosarcoma viral oncogene homolog                                                                                  | 1.713 | 7.83E-03 |
| GCLM     | glutamate-cysteine ligase, modifier subunit                                                                                           | 1.192 | 7.77E-03 |
| GDE1     | glycerophosphodiester phosphodiesterase 1                                                                                             | 1.514 | 2.06E-03 |
| GK       | glycerol kinase                                                                                                                       | 2.072 | 7.12E-05 |
| GPX3     | glutathione peroxidase 3 (plasma)                                                                                                     | 3.682 | 1.19E-04 |
| GRPEL1   | GrpE-like 1, mitochondrial (E. coli)                                                                                                  | 1.226 | 9.42E-05 |
| GSTM4    | glutathione S-transferase mu 4                                                                                                        | 1.346 | 4.83E-03 |
| GYG1     | glycogenin 1                                                                                                                          | 1.136 | 1.63E-02 |
| H1F0     | H1 histone family, member 0                                                                                                           | 1.388 | 2.13E-02 |
| HADHA    | hydroxyacyl-Coenzyme A dehydrogenase/3-ketoacyl-Coenzyme A thiolase/enoyl-Coenzyme A hydratase (trifunctional protein), alpha subunit | 1.462 | 1.94E-04 |
| HADHB    | hydroxyacyl-Coenzyme A dehydrogenase/3-ketoacyl-Coenzyme A thiolase/enoyl-Coenzyme A hydratase (trifunctional protein), beta subunit  | 1.214 | 2.03E-05 |
| HDC      | histidine decarboxylase                                                                                                               | 1.451 | 2.44E-02 |
| HPRT1    | hypoxanthine phosphoribosyltransferase 1                                                                                              | 1.238 | 7.06E-03 |
| HSD17B13 | hydroxysteroid (17-beta) dehydrogenase 13                                                                                             | 1.263 | 1.68E-02 |
| HSF2BP   | heat shock transcription factor 2 binding protein                                                                                     | 1.798 | 3.01E-03 |
| HSPB8    | heat shock 22kDa protein 8                                                                                                            | 1.388 | 1.15E-03 |
| ID2      | inhibitor of DNA binding 2, dominant negative helix-loop-helix protein                                                                | 1.280 | 3.23E-04 |
| IDH1     | isocitrate dehydrogenase 1 (NADP+), soluble                                                                                           | 1.187 | 9.21E-03 |
| IDH3A    | isocitrate dehydrogenase 3 (NAD+) alpha                                                                                               | 1.214 | 4.15E-02 |

|                                   |                                                                |       |          |
|-----------------------------------|----------------------------------------------------------------|-------|----------|
| IGFBP2                            | insulin-like growth factor binding protein 2, 36kDa            | 1.635 | 2.46E-08 |
| IHPK1                             | inositol hexakisphosphate kinase 1                             | 3.399 | 4.57E-03 |
| IL1A                              | interleukin 1, alpha                                           | 2.029 | 8.63E-03 |
| IL1RN                             | interleukin 1 receptor antagonist                              | 1.645 | 2.63E-04 |
| LDHA                              | lactate dehydrogenase A                                        | 1.560 | 6.36E-04 |
| LDHB                              | lactate dehydrogenase B                                        | 1.313 | 1.19E-03 |
| LGALS3BP                          | lectin, galactoside-binding, soluble, 3 binding protein        | 1.341 | 1.66E-05 |
| LGALS4                            | lectin, galactoside-binding, soluble, 4                        | 1.551 | 3.56E-05 |
| LPCAT3                            | lysophosphatidylcholine acyltransferase 3                      | 1.252 | 2.61E-03 |
| MAT1A                             | methionine adenosyltransferase I, alpha                        | 1.125 | 3.62E-02 |
| MBL2                              | mannose-binding lectin (protein C) 2, soluble (opsonic defect) | 1.353 | 2.19E-02 |
| MINA                              | MYC induced nuclear antigen                                    | 1.127 | 4.31E-02 |
| MRPS35                            | mitochondrial ribosomal protein S35                            | 1.318 | 3.17E-02 |
| MTIF2                             | mitochondrial translational initiation factor 2                | 1.252 | 3.24E-02 |
| NET1                              | neuroepithelial cell transforming 1                            | 1.211 | 2.21E-03 |
| NHEJ1                             | nonhomologous end-joining factor 1                             | 1.277 | 3.49E-02 |
| NQO2                              | NAD(P)H dehydrogenase, quinone 2                               | 1.313 | 4.54E-03 |
| NR2C1                             | nuclear receptor subfamily 2, group C, member 1                | 1.359 | 2.98E-04 |
| NR4A1                             | nuclear receptor subfamily 4, group A, member 1                | 2.813 | 2.49E-04 |
| NUDT17<br>(includes<br>EG:200035) | nudix (nucleoside diphosphate linked moiety X)-type motif 17   | 1.516 | 5.61E-04 |
| OAT                               | ornithine aminotransferase (gyrate atrophy)                    | 1.593 | 3.78E-02 |
| ODC1                              | ornithine decarboxylase 1                                      | 1.572 | 1.95E-02 |
| OLR1                              | oxidized low density lipoprotein (lectin-like) receptor 1      | 2.909 | 5.90E-03 |
| OPTN                              | optineurin                                                     | 1.257 | 1.55E-02 |
| OSTALPHA                          | organic solute transporter alpha                               | 2.755 | 1.40E-02 |
| OXSM                              | 3-oxoacyl-ACP synthase, mitochondrial                          | 1.314 | 2.50E-04 |
| P2RX4                             | purinergic receptor P2X, ligand-gated ion channel, 4           | 1.846 | 1.32E-13 |
| P2RY1                             | purinergic receptor P2Y, G-protein coupled, 1                  | 1.543 | 6.55E-04 |
| P4HA2                             | prolyl 4-hydroxylase, alpha polypeptide II                     | 1.511 | 2.46E-03 |
| PARP9                             | poly (ADP-ribose) polymerase family, member 9                  | 1.177 | 4.04E-02 |
| PC                                | pyruvate carboxylase                                           | 1.448 | 1.63E-03 |
| PDLIM1                            | PDZ and LIM domain 1                                           | 1.265 | 2.62E-02 |
| PGCP                              | plasma glutamate carboxypeptidase                              | 1.862 | 1.51E-04 |
| PLA2G16                           | phospholipase A2, group XVI                                    | 1.577 | 4.17E-04 |
| PLAUR                             | plasminogen activator, urokinase receptor                      | 3.101 | 2.39E-02 |
| PNPLA2                            | patatin-like phospholipase domain containing 2                 | 1.155 | 3.00E-02 |
| POLR3GL                           | polymerase (RNA) III (DNA directed) polypeptide G (32kD)-like  | 1.154 | 1.24E-02 |
| PRPSAP2                           | phosphoribosyl pyrophosphate synthetase-associated protein 2   | 1.209 | 4.83E-02 |
| PTPLAD2                           | protein tyrosine phosphatase-like A domain containing 2        | 1.440 | 3.68E-02 |
| RAB30                             | RAB30, member RAS oncogene family                              | 2.285 | 6.26E-10 |
| RBPMS                             | RNA binding protein with multiple splicing                     | 1.192 | 9.21E-03 |

|          |                                                                                               |       |          |
|----------|-----------------------------------------------------------------------------------------------|-------|----------|
| RCAN3    | RCAN family member 3                                                                          | 1.521 | 1.59E-02 |
| REEP5    | receptor accessory protein 5                                                                  | 1.276 | 2.77E-03 |
| RGS16    | regulator of G-protein signaling 16                                                           | 1.705 | 9.60E-03 |
| RNF4     | ring finger protein 4                                                                         | 1.195 | 1.56E-03 |
| RRP15    | ribosomal RNA processing 15 homolog (S. cerevisiae)                                           | 1.304 | 3.25E-02 |
| RXRG     | retinoid X receptor, gamma                                                                    | 4.875 | 5.92E-04 |
| SCARB1   | scavenger receptor class B, member 1                                                          | 1.224 | 1.36E-02 |
| SDF4     | stromal cell derived factor 4                                                                 | 1.218 | 7.97E-03 |
| SEC61A2  | Sec61 alpha 2 subunit (S. cerevisiae)                                                         | 1.412 | 1.66E-03 |
| SERINC2  | serine incorporator 2                                                                         | 1.400 | 1.80E-03 |
| SERPINE1 | serpin peptidase inhibitor, clade E (nexin, plasminogen activator inhibitor type 1), member 1 | 2.790 | 1.04E-04 |
| SFXN4    | sideroflexin 4                                                                                | 1.202 | 6.04E-03 |
| SH3BGRL2 | SH3 domain binding glutamic acid-rich protein like 2                                          | 1.271 | 6.23E-03 |
| SH3BGRL3 | SH3 domain binding glutamic acid-rich protein like 3                                          | 1.150 | 2.76E-02 |
| SIRPA    | signal-regulatory protein alpha                                                               | 1.196 | 2.72E-02 |
| SLC22A5  | solute carrier family 22 (organic cation/carnitine transporter), member 5                     | 1.554 | 4.12E-03 |
| SLC25A20 | solute carrier family 25 (carnitine/acylcarnitine translocase), member 20                     | 1.215 | 2.06E-05 |
| SLC25A4  | solute carrier family 25 (mitochondrial carrier; adenine nucleotide translocator), member 4   | 1.120 | 3.97E-02 |
| SLC25A40 | solute carrier family 25, member 40                                                           | 1.415 | 4.22E-02 |
| SLC27A4  | solute carrier family 27 (fatty acid transporter), member 4                                   | 1.256 | 9.88E-03 |
| SLC38A5  | solute carrier family 38, member 5                                                            | 2.429 | 2.24E-02 |
| SNAPIN   | SNAP-associated protein                                                                       | 1.148 | 5.71E-03 |
| SSR3     | signal sequence receptor, gamma (translocon-associated protein gamma)                         | 1.321 | 1.10E-02 |
| STARD5   | StAR-related lipid transfer (START) domain containing 5                                       | 1.206 | 1.08E-02 |
| SUMO3    | SMT3 suppressor of mif two 3 homolog 3 (S. cerevisiae)                                        | 1.179 | 3.50E-02 |
| TAF13    | TAF13 RNA polymerase II, TATA box binding protein (TBP)-associated factor, 18kDa              | 1.093 | 4.79E-02 |
| TDH      | L-threonine dehydrogenase                                                                     | 1.458 | 6.11E-04 |
| TERF1    | telomeric repeat binding factor (NIMA-interacting) 1                                          | 1.165 | 6.47E-03 |
| THG1L    | tRNA-histidine guanylyltransferase 1-like (S. cerevisiae)                                     | 1.210 | 9.55E-03 |
| TM4SF1   | transmembrane 4 L six family member 1                                                         | 1.433 | 1.77E-03 |
| TMEM120A | transmembrane protein 120A                                                                    | 2.700 | 0.00E00  |
| TMEM49   | transmembrane protein 49                                                                      | 1.275 | 8.11E-06 |
| TMEM68   | transmembrane protein 68                                                                      | 1.191 | 2.35E-02 |
| TUBB6    | tubulin, beta 6                                                                               | 1.233 | 3.28E-03 |
| TUFT1    | tuftelin 1                                                                                    | 2.047 | 2.67E-02 |
| UMPS     | uridine monophosphate synthetase                                                              | 1.131 | 4.37E-02 |
| VCL      | vinculin                                                                                      | 1.700 | 1.44E-02 |
| WDR18    | WD repeat domain 18                                                                           | 1.119 | 2.63E-02 |
