# Supplementary material
Source: PubMed Central journal article supplement (PMC3008362)
Supplement: tableS2.pdf [file tableS2.pdf]

1 **Supplementary Table 2. Down-regulated genes mapped to the IPA database**

2

| Gene                            | Description                                                                         | Fold   | P-like value |
|---------------------------------|-------------------------------------------------------------------------------------|--------|--------------|
| ABCG8                           | ATP-binding cassette, sub-family G (WHITE), member 8                                | -5.669 | 2.56E-03     |
| ACACA                           | acetyl-Coenzyme A carboxylase alpha                                                 | -2.992 | 2.61E-02     |
| ACSM1                           | acyl-CoA synthetase medium-chain family member 1                                    | -1.207 | 1.04E-05     |
| AGTR1                           | angiotensin II receptor, type 1                                                     | -1.329 | 5.41E-03     |
| AHSG                            | alpha-2-HS-glycoprotein                                                             | -1.269 | 6.14E-03     |
| AIF1L                           | allograft inflammatory factor 1-like                                                | -1.751 | 1.33E-02     |
| AKR1A1                          | aldo-keto reductase family 1, member A1 (aldehyde reductase)                        | -1.096 | 3.98E-02     |
| ALCAM                           | activated leukocyte cell adhesion molecule                                          | -1.280 | 4.40E-02     |
| ALDH1A1                         | aldehyde dehydrogenase 1 family, member A1                                          | -1.122 | 1.38E-02     |
| AOX1                            | aldehyde oxidase 1                                                                  | -1.595 | 1.82E-06     |
| AP3S1                           | adaptor-related protein complex 3, sigma 1 subunit                                  | -1.284 | 5.06E-03     |
| APOH                            | apolipoprotein H (beta-2-glycoprotein I)                                            | -1.161 | 7.41E-03     |
| ARHGDIB                         | Rho GDP dissociation inhibitor (GDI) beta                                           | -1.219 | 5.62E-03     |
| ARHGEF12                        | Rho guanine nucleotide exchange factor (GEF) 12                                     | -1.141 | 6.04E-03     |
| ARL4D                           | ADP-ribosylation factor-like 4D                                                     | -1.424 | 1.34E-02     |
| ASPN                            | asporin                                                                             | -1.249 | 4.34E-02     |
| ATP5G2                          | ATP synthase, H+ transporting, mitochondrial F0 complex, subunit C2 (subunit 9)     | -1.125 | 1.83E-02     |
| BEX2                            | brain expressed X-linked 2                                                          | -1.227 | 5.38E-03     |
| BPNT1                           | 3'(2'), 5'-bisphosphate nucleotidase 1                                              | -1.140 | 3.94E-03     |
| BTG1                            | B-cell translocation gene 1, anti-proliferative                                     | -1.444 | 1.91E-02     |
| C12ORF44                        | chromosome 12 open reading frame 44                                                 | -1.132 | 1.28E-02     |
| C13ORF27                        | chromosome 13 open reading frame 27                                                 | -1.590 | 1.43E-03     |
| C14ORF129                       | chromosome 14 open reading frame 129                                                | -1.288 | 8.15E-04     |
| C1GALT1                         | core 1 synthase, glycoprotein-N-acetylgalactosamine 3-beta-galactosyltransferase, 1 | -1.391 | 9.59E-04     |
| C9ORF64                         | chromosome 9 open reading frame 64                                                  | -1.180 | 1.22E-03     |
| CA3                             | carbonic anhydrase III, muscle specific                                             | -1.888 | 6.63E-03     |
| CARHSP1                         | calcium regulated heat stable protein 1, 24kDa                                      | -1.396 | 4.10E-04     |
| CCL19                           | chemokine (C-C motif) ligand 19                                                     | -1.499 | 3.06E-02     |
| CCNG1                           | cyclin G1                                                                           | -1.399 | 6.76E-05     |
| CD14                            | CD14 molecule                                                                       | -1.392 | 1.43E-02     |
| CDK7                            | cyclin-dependent kinase 7                                                           | -1.217 | 1.72E-03     |
| CES2<br>(includes<br>EG:8824)   | carboxylesterase 2 (intestine, liver)                                               | -1.481 | 3.47E-03     |
| CHPT1                           | choline phosphotransferase 1                                                        | -1.276 | 1.59E-06     |
| CHUK                            | conserved helix-loop-helix ubiquitous kinase                                        | -1.142 | 3.56E-04     |
| CIB1                            | calcium and integrin binding 1 (calmyrin)                                           | -1.146 | 2.50E-02     |
| CLIC1                           | chloride intracellular channel 1                                                    | -1.155 | 4.70E-02     |
| CNIH                            | cornichon homolog (Drosophila)                                                      | -1.141 | 2.22E-02     |
| COPB1                           | coatamer protein complex, subunit beta 1                                            | -1.168 | 1.15E-03     |
| COX6B1                          | cytochrome c oxidase subunit V1b polypeptide 1 (ubiquitous)                         | -1.076 | 3.49E-02     |
| CYLD                            | cylindromatosis (turban tumor syndrome)                                             | -1.399 | 5.19E-04     |
| CYP2E1                          | cytochrome P450, family 2, subfamily E, polypeptide 1                               | -1.156 | 1.66E-02     |
| CYP2U1                          | cytochrome P450, family 2, subfamily U, polypeptide 1                               | -1.331 | 2.48E-03     |
| DCN                             | decorin                                                                             | -1.116 | 1.08E-02     |
| DHRS7<br>(includes<br>EG:51635) | dehydrogenase/reductase (SDR family) member 7                                       | -1.214 | 6.18E-04     |
| DIRAS3                          | DIRAS family, GTP-binding RAS-like 3                                                | -6.865 | 6.35E-07     |

|                              |                                                                     |         |          |
|------------------------------|---------------------------------------------------------------------|---------|----------|
| DNAJA1                       | DnaJ (Hsp40) homolog, subfamily A, member 1                         | -1.313  | 8.30E-03 |
| DSG1                         | desmoglein 1                                                        | -2.105  | 3.56E-02 |
| DUSP10                       | dual specificity phosphatase 10                                     | -1.616  | 2.18E-06 |
| ECHDC2                       | enoyl Coenzyme A hydratase domain containing 2                      | -1.232  | 5.65E-04 |
| EFNA1                        | ephrin-A1                                                           | -1.558  | 2.69E-02 |
| EIF2C3                       | eukaryotic translation initiation factor 2C, 3                      | -1.143  | 2.47E-02 |
| EIF3H                        | eukaryotic translation initiation factor 3, subunit H               | -1.189  | 1.65E-04 |
| EIF4EBP1                     | eukaryotic translation initiation factor 4E binding protein 1       | -1.362  | 3.20E-03 |
| ENPEP                        | glutamyl aminopeptidase (aminopeptidase A)                          | -1.298  | 1.02E-02 |
| EPB41L5                      | erythrocyte membrane protein band 4.1 like 5                        | -1.249  | 3.33E-03 |
| ERRFI1                       | ERBB receptor feedback inhibitor 1                                  | -1.248  | 4.91E-02 |
| FABP1                        | fatty acid binding protein 1, liver                                 | -1.302  | 1.51E-03 |
| FADS2                        | fatty acid desaturase 2                                             | -19.603 | 7.97E-10 |
| FAM98A                       | family with sequence similarity 98, member A                        | -1.150  | 8.03E-03 |
| FARS2                        | phenylalanyl-tRNA synthetase 2, mitochondrial                       | -2.051  | 2.00E-03 |
| FBXO34                       | F-box protein 34                                                    | -1.118  | 2.09E-02 |
| FBXO9                        | F-box protein 9                                                     | -1.247  | 2.27E-02 |
| FOXA3                        | forkhead box A3                                                     | -2.048  | 7.39E-04 |
| FUBP1                        | far upstream element (FUSE) binding protein 1                       | -1.222  | 2.14E-02 |
| FXR1                         | fragile X mental retardation, autosomal homolog 1                   | -1.259  | 2.30E-06 |
| GALM                         | galactose mutarotase (aldose 1-epimerase)                           | -1.376  | 1.48E-03 |
| GAMT                         | guanidinoacetate N-methyltransferase                                | -1.146  | 1.67E-03 |
| GJA1                         | gap junction protein, alpha 1, 43kDa                                | -1.387  | 1.23E-04 |
| GJC1                         | gap junction protein, gamma 1, 45kDa                                | -2.418  | 1.96E-02 |
| GKAP1                        | G kinase anchoring protein 1                                        | -1.211  | 1.80E-04 |
| GNG11                        | guanine nucleotide binding protein (G protein), gamma 11            | -1.290  | 4.51E-03 |
| GNPTG                        | N-acetylglucosamine-1-phosphate transferase, gamma subunit          | -1.190  | 3.47E-02 |
| GNS                          | glucosamine (N-acetyl)-6-sulfatase                                  | -1.121  | 2.67E-02 |
| GPBP1                        | GC-rich promoter binding protein 1                                  | -1.082  | 2.55E-02 |
| GPR37                        | G protein-coupled receptor 37 (endothelin receptor type B-like)     | -1.842  | 1.30E-03 |
| GTF2H1                       | general transcription factor IIIH, polypeptide 1, 62kDa             | -1.115  | 4.01E-02 |
| HAT1                         | histone acetyltransferase 1                                         | -1.173  | 9.28E-04 |
| HBB<br>(includes<br>EG:3043) | hemoglobin, beta                                                    | -4.384  | 3.66E-04 |
| HDGF                         | hepatoma-derived growth factor (high-mobility group protein 1-like) | -1.245  | 3.36E-04 |
| HEXIM1                       | hexamethylene bis-acetamide inducible 1                             | -1.392  | 7.68E-03 |
| HEYL                         | hairy/enhancer-of-split related with YRPW motif-like                | -2.270  | 9.35E-06 |
| HIBADH                       | 3-hydroxyisobutyrate dehydrogenase                                  | -1.138  | 9.95E-03 |
| HSD17B2                      | hydroxysteroid (17-beta) dehydrogenase 2                            | -1.849  | 2.88E-07 |
| HSD17B4                      | hydroxysteroid (17-beta) dehydrogenase 4                            | -1.184  | 2.15E-02 |
| IGFALS                       | insulin-like growth factor binding protein, acid labile subunit     | -6.422  | 6.43E-05 |
| IGFBP3                       | insulin-like growth factor binding protein 3                        | -1.680  | 1.43E-08 |
| IHPK2                        | inositol hexakisphosphate kinase 2                                  | -1.426  | 1.07E-02 |
| INTS7                        | integrator complex subunit 7                                        | -1.585  | 1.62E-02 |
| ITFG1                        | integrin alpha FG-GAP repeat containing 1                           | -1.218  | 2.65E-04 |
| ITM2B                        | integral membrane protein 2B                                        | -1.136  | 1.76E-02 |
| KIAA1191                     | KIAA1191                                                            | -1.316  | 3.99E-04 |
| LAPTM4A                      | lysosomal protein transmembrane 4 alpha                             | -1.212  | 6.30E-03 |
| LEAP2                        | liver expressed antimicrobial peptide 2                             | -1.384  | 1.41E-02 |
| LIPC                         | lipase, hepatic                                                     | -1.385  | 2.49E-02 |

|                                 |                                                                         |        |          |
|---------------------------------|-------------------------------------------------------------------------|--------|----------|
| LSM8                            | LSM8 homolog, U6 small nuclear RNA associated (S. cerevisiae)           | -1.112 | 3.95E-02 |
| MCTS1                           | malignant T cell amplified sequence 1                                   | -1.219 | 5.19E-03 |
| MED31                           | mediator complex subunit 31                                             | -1.158 | 3.40E-02 |
| MIS12                           | MIS12, MIND kinetochore complex component, homolog (yeast)              | -1.423 | 2.03E-04 |
| MON1A                           | MON1 homolog A (yeast)                                                  | -1.124 | 1.85E-02 |
| MRPL23                          | mitochondrial ribosomal protein L23                                     | -1.189 | 2.20E-04 |
| NFIA                            | nuclear factor I/A                                                      | -1.275 | 8.73E-03 |
| NFYB                            | nuclear transcription factor Y, beta                                    | -1.820 | 9.50E-13 |
| NMNAT1                          | nicotinamide nucleotide adenyltransferase 1                             | -1.171 | 2.72E-02 |
| NPM1<br>(includes<br>EG:18148)  | nucleophosmin 1                                                         | -1.150 | 2.88E-02 |
| NR2F1                           | nuclear receptor subfamily 2, group F, member 1                         | -1.189 | 2.75E-02 |
| NRXN1                           | neurexin 1                                                              | -1.337 | 3.49E-02 |
| OAZ1                            | ornithine decarboxylase antizyme 1                                      | -1.123 | 2.13E-02 |
| OLFML3                          | olfactomedin-like 3                                                     | -1.348 | 1.23E-04 |
| OSGIN1                          | oxidative stress induced growth inhibitor 1                             | -1.244 | 1.70E-02 |
| OSTF1                           | osteoclast stimulating factor 1                                         | -1.206 | 6.19E-03 |
| OTC                             | ornithine carbamoyltransferase                                          | -1.274 | 2.44E-02 |
| PAH                             | phenylalanine hydroxylase                                               | -1.110 | 2.77E-02 |
| PDCD4                           | programmed cell death 4 (neoplastic transformation inhibitor)           | -1.311 | 8.61E-03 |
| PHF23                           | PHD finger protein 23                                                   | -1.513 | 4.89E-02 |
| PKLR                            | pyruvate kinase, liver and RBC                                          | -1.638 | 2.16E-05 |
| PNRC2<br>(includes<br>EG:55629) | proline-rich nuclear receptor coactivator 2                             | -1.168 | 6.19E-03 |
| PPM1B                           | protein phosphatase 1B (formerly 2C), magnesium-dependent, beta isoform | -1.105 | 1.98E-03 |
| PPP1CC                          | protein phosphatase 1, catalytic subunit, gamma isoform                 | -1.215 | 7.65E-05 |
| PRSS23                          | protease, serine, 23                                                    | -1.296 | 7.58E-05 |
| PRSS35                          | protease, serine, 35                                                    | -1.505 | 2.81E-04 |
| PSMA7                           | proteasome (prosome, macropain) subunit, alpha type, 7                  | -1.097 | 3.54E-02 |
| PSMB3                           | proteasome (prosome, macropain) subunit, beta type, 3                   | -1.104 | 2.90E-02 |
| PSMD5                           | proteasome (prosome, macropain) 26S subunit, non-ATPase, 5              | -1.091 | 3.92E-02 |
| PSME2                           | proteasome (prosome, macropain) activator subunit 2 (PA28 beta)         | -1.232 | 5.96E-04 |
| PTH1R                           | parathyroid hormone 1 receptor                                          | -1.307 | 1.39E-02 |
| PYCARD                          | PYD and CARD domain containing                                          | -1.248 | 1.67E-02 |
| RAB5A                           | RAB5A, member RAS oncogene family                                       | -1.204 | 2.73E-02 |
| RABGEF1                         | RAB guanine nucleotide exchange factor (GEF) 1                          | -1.244 | 3.98E-02 |
| RAMP1                           | receptor (G protein-coupled) activity modifying protein 1               | -1.222 | 2.95E-02 |
| RAP2C                           | RAP2C, member of RAS oncogene family                                    | -1.698 | 1.11E-06 |
| RB1                             | retinoblastoma 1                                                        | -1.279 | 1.46E-03 |
| RBM14                           | RNA binding motif protein 14                                            | -1.162 | 3.46E-02 |
| RGS5                            | regulator of G-protein signaling 5                                      | -1.808 | 3.14E-03 |
| RNF128                          | ring finger protein 128                                                 | -1.243 | 1.60E-03 |
| RPAIN                           | RPA interacting protein                                                 | -1.301 | 3.49E-04 |
| RPL10A<br>(includes<br>EG:4736) | ribosomal protein L10a                                                  | -1.122 | 1.48E-03 |
| RPL13                           | ribosomal protein L13                                                   | -1.137 | 1.21E-03 |
| RPL18                           | ribosomal protein L18                                                   | -1.140 | 1.36E-02 |
| RPL24                           | ribosomal protein L24                                                   | -1.116 | 1.61E-02 |
| RPS15                           | ribosomal protein S15                                                   | -1.095 | 1.08E-02 |

|                                  |                                                                                          |        |          |
|----------------------------------|------------------------------------------------------------------------------------------|--------|----------|
| RPS20                            | ribosomal protein S20                                                                    | -1.091 | 4.42E-02 |
| RTCD1                            | RNA terminal phosphate cyclase domain 1                                                  | -1.082 | 4.81E-02 |
| SAT1                             | spermidine/spermine N1-acetyltransferase 1                                               | -1.188 | 6.68E-03 |
| SEC16B                           | SEC16 homolog B ( <i>S. cerevisiae</i> )                                                 | -1.694 | 5.31E-03 |
| SELENBP1                         | selenium binding protein 1                                                               | -1.323 | 1.38E-03 |
| SEPT4                            | septin 4                                                                                 | -1.567 | 1.92E-04 |
| SEPT7                            | septin 7                                                                                 | -1.109 | 9.18E-03 |
| SFTPD                            | surfactant protein D                                                                     | -7.054 | 2.39E-08 |
| SH3YL1                           | SH3 domain containing, Ysc84-like 1 ( <i>S. cerevisiae</i> )                             | -1.408 | 7.00E-04 |
| SIRT5                            | sirtuin (silent mating type information regulation 2 homolog) 5 ( <i>S. cerevisiae</i> ) | -1.148 | 2.97E-03 |
| SLC17A2                          | solute carrier family 17 (sodium phosphate), member 2                                    | -1.549 | 1.17E-06 |
| SLC1A4                           | solute carrier family 1 (glutamate/neutral amino acid transporter), member 4             | -2.198 | 2.79E-02 |
| SLC37A4                          | solute carrier family 37 (glucose-6-phosphate transporter), member 4                     | -1.480 | 1.70E-02 |
| SLC39A7                          | solute carrier family 39 (zinc transporter), member 7                                    | -1.185 | 2.42E-02 |
| SMAD2                            | SMAD family member 2                                                                     | -1.139 | 1.68E-03 |
| SNRNP40                          | small nuclear ribonucleoprotein 40kDa (U5)                                               | -1.151 | 4.20E-03 |
| SPARCL1                          | SPARC-like 1 (hevin)                                                                     | -1.125 | 3.62E-02 |
| SPAST                            | spastin                                                                                  | -1.121 | 3.85E-02 |
| SPATA20                          | spermatogenesis associated 20                                                            | -1.628 | 3.38E-02 |
| STAMBP                           | STAM binding protein                                                                     | -1.096 | 1.12E-02 |
| STAP2                            | signal transducing adaptor family member 2                                               | -1.203 | 5.48E-03 |
| STX5                             | syntaxin 5                                                                               | -1.191 | 3.86E-02 |
| SUGT1                            | SGT1, suppressor of G2 allele of SKP1 ( <i>S. cerevisiae</i> )                           | -1.175 | 1.14E-02 |
| TAF9                             | TAF9 RNA polymerase II, TATA box binding protein (TBP)-associated factor, 32kDa          | -1.123 | 4.74E-02 |
| TAGLN2                           | transgelin 2                                                                             | -1.108 | 4.89E-02 |
| TCEB2                            | transcription elongation factor B (SIII), polypeptide 2 (18kDa, elongin B)               | -1.240 | 4.73E-03 |
| TDG                              | thymine-DNA glycosylase                                                                  | -1.192 | 6.32E-03 |
| TGM2                             | transglutaminase 2 (C polypeptide, protein-glutamine-gamma-glutamyltransferase)          | -1.458 | 3.47E-02 |
| THOC4                            | THO complex 4                                                                            | -1.191 | 2.24E-02 |
| THOC7                            | THO complex 7 homolog ( <i>Drosophila</i> )                                              | -1.161 | 3.31E-04 |
| THRSP                            | thyroid hormone responsive (SPOT14 homolog, rat)                                         | -2.276 | 3.13E-02 |
| TIMD4                            | T-cell immunoglobulin and mucin domain containing 4                                      | -1.421 | 2.50E-02 |
| TMEM128                          | transmembrane protein 128                                                                | -1.128 | 5.72E-04 |
| TPMT                             | thiopurine S-methyltransferase                                                           | -1.235 | 1.91E-02 |
| TRAFD1                           | TRAF-type zinc finger domain containing 1                                                | -1.109 | 4.28E-02 |
| TTC35                            | tetratricopeptide repeat domain 35                                                       | -1.120 | 3.44E-03 |
| TTR                              | transthyretin                                                                            | -1.324 | 7.19E-04 |
| TXNDC1                           | thioredoxin domain containing 1                                                          | -1.090 | 2.77E-02 |
| TXNL4A<br>(includes<br>EG:10907) | thioredoxin-like 4A                                                                      | -1.102 | 3.34E-02 |
| TXNL4B                           | thioredoxin-like 4B                                                                      | -1.639 | 1.71E-03 |
| U2AF1                            | U2 small nuclear RNA auxiliary factor 1                                                  | -1.130 | 2.74E-02 |
| UBE2G1                           | ubiquitin-conjugating enzyme E2G 1 (UBC7 homolog, yeast)                                 | -1.259 | 1.71E-03 |
| VAMP5                            | vesicle-associated membrane protein 5 (myobrevin)                                        | -1.154 | 4.45E-02 |
| VCAM1                            | vascular cell adhesion molecule 1                                                        | -1.227 | 1.21E-02 |
| VKORC1                           | vitamin K epoxide reductase complex, subunit 1                                           | -1.136 | 4.65E-02 |
| ZDHHC3                           | zinc finger, DHHC-type containing 3                                                      | -1.084 | 2.94E-02 |
| ZNF238                           | zinc finger protein 238                                                                  | -1.301 | 1.25E-03 |
