# Supplementary material
Source: PubMed Central journal article supplement (PMC3008362)

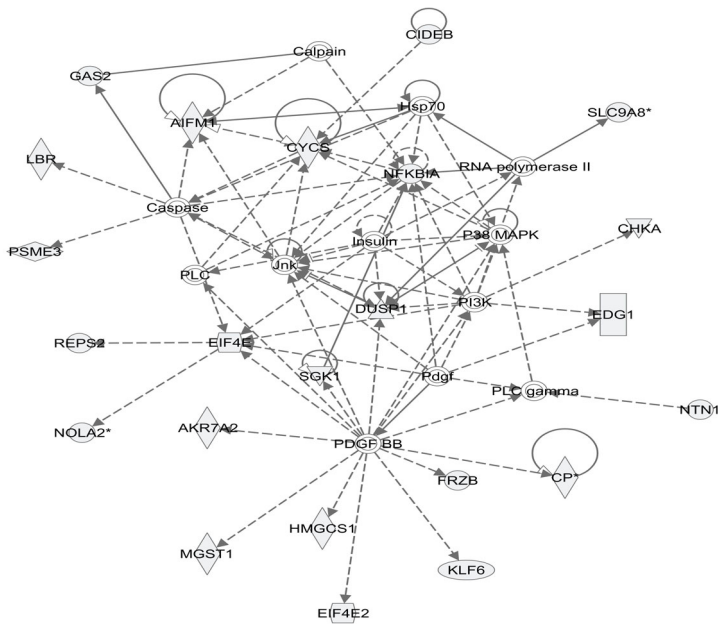

**Network 1**

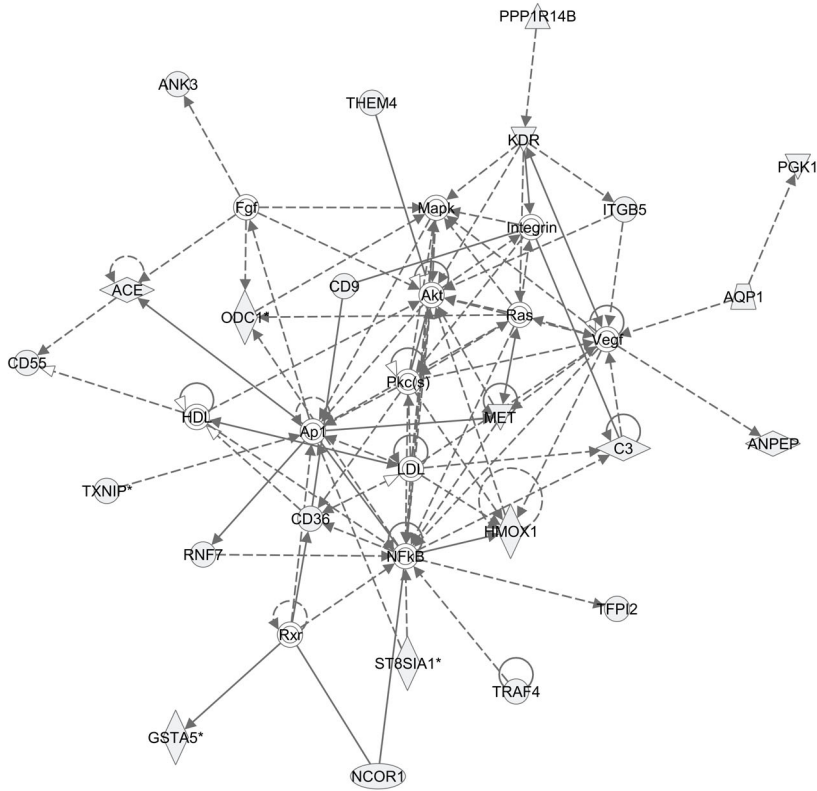

**Network 2**

Supplement: figS1.pdf [file figS1.pdf]
